# Supplementary material
Source: Research Square preprint supplement (doi:10.21203/rs.3.rs-7993693/v2)
Supplement: Supplementary file 1 [file 50b04e422bd4c5f37e25729d.xlsx]

## Sheet: Strains
Name	Characteristics	References	Lab stock
Agrobacterium strains
C58	wild type strain for all Agrobacterium if not indicated. Phytopathogen isolated from cherry trees.	E. W. Nester's Lab	EML530
ΔtssL	In-frame deletion of tssL in the Agrobacterium wild type background.	Ma et al., 2009	EML1073
ΔtssX	In-frame deletion of tssX in the Agrobacterium wild type background.	This study	EML3250
sfgfp-tssL	sfGFP knock-in in the N-terminus of TssL in the Agrobacterium C58 background	This study	EML3308
sfgfp-tssL ΔtssX	In-frame deletion of tssX in the sfgfp-tssL background.	This study	EML8729
sfgfp-tssL ΔtssM	In-frame deletion of tssM in the sfgfp-tssL background.	This study	EML8754
sfgfp-tssL ΔtssK	In-frame deletion of tssK in the sfgfp-tssL background.	This study	EML8755
sfgfp-tssL ΔtssC40	In-frame deletion of tssC40 in the sfgfp-tssL background.	This study	EML8741
sfgfp-tssL Δfha	In-frame deletion of fha in the sfgfp-tssL background.	This study	EML8745
sfgfp-tssG	sfGFP knock-in in the N-terminus of TssG in the Agrobacterium C58 background	This study	EML8705
sfgfp-tssG ΔtssX	In-frame deletion of tssX in the sfgfp-tssG background.	This study	EML8730
sfgfp-tssG ΔtssM	In-frame deletion of tssM in the sfgfp-tssG background.	This study	EML8733
sfgfp-tssG ΔtssK	In-frame deletion of tssK in the sfgfp-tssG background.	This study	EML8738
sfgfp-tssG ΔtssC40	In-frame deletion of tssC40 in the sfgfp-tssG background.	This study	EML8742
sfgfp-tssG Δfha	In-frame deletion of fha in the sfgfp-tssG background.	This study	EML8735
tssB-sfGFP	sfGFP knock-in in the C-terminus of TssB in the Agrobacterium C58 background	This study	EML3314
tssB-sfGFP ΔtssX	In-frame deletion of tssX in the tssB-sfgfp background.	This study	EML8731
tssB-sfGFP ΔtssM	In-frame deletion of tssM in the tssB-sfgfp background.	This study	EML8734
tssB-sfGFP ΔtssK	In-frame deletion of tssK in the tssB-sfgfp background.	This study	EML8739
tssB-sfGFP ΔtssC40	In-frame deletion of tssC40 in the tssB-sfgfp background.	This study	EML8743
tssB-sfGFP Δfha	In-frame deletion of fha in the tssB-sfgfp background.	This study	LK(F)F6
tssX-mCherry2	mCherry2 knock-in between the 55th and 56th residues of TssX in the Agrobacterium C58 background.	This study	EML3288
tssX-mNroGreen	mNeonGreen knock-in between the 55th and 56th residues of TssX in the Agrobacterium C58 background.	This study	EML8714
tssB-mCherry2	mCherry2 knock-in in the C-terminus of TssB in the Agrobacterium C58 background.	This study	EML8707
Δucdgs	∆crdS∆cel∆exoA∆chvAB∆upp	Xu et al., 2013	EML8753
ΔucdgsΔtssX	In-frame deletion of tssX in the Δucdgs background.	This study	EML8760
ΔtssLΔtssM	In-frame deletion of tssL and tssM in the Agrobacterium wild type background.	Ma et al., 2009	EML1761
ΔtssXΔtssLΔtssM	In-frame deletion of tssX in the ΔtssLΔtssM background.	This study	EML3241
12D1	Wild type agrobacterial strain.	Wu et al., 2019	EML490
12D1 ΔtssX	In-frame deletion of tssX in the 12D1 background.	This study	EML8761
12D1 ΔtssL	In-frame deletion of tssL in the 12D1 background.	Wu et al., 2019	EML4635
1D1108	Wild type agrobacterial strain isolated from Euonymus.	Wroblewski et al., 2005	EML302
1D1108 ΔtssX	In-frame deletion of tssX in the 1D1108 background.	This study	EML8762
1D1108 ΔtssL	In-frame deletion of tssL in the 1D1108 background.	Wu et al., 2019	EML4631
E. coli strains
DH5α	recA1 endA1 lacZ∆M15. Strain for vector cloning and propagation.	Michael E. Kovach et al.,Biotechniques 16(5):800	EML14
BW25113	Δ(araD-araB)567 Δ(rhaD-rhaB)568 ΔlacZ4787 (::rrnB-3) hsdR514 rph-1. Prey for interbacterial killing assay.	NBRP	EML5398

## Sheet: Vectors
Name	Characteristics	References	Lab stock
Expression vectors
pTrc200	SpR. ColE1+pVS1 origin. LacI expression cassette. Shuttle vector for gene expression driven by trc promoter.	Schmidt-Eisenlohr et al., 1999	EML904
pTrc::tssX	pTrc200 vector expressing tssX (ATU_RS20270).	This study	EML3196
pTrc::tssX^C16A	pTrc200 vector expressing tssX(C16A).	This study	EML3254
pTrc::tssX^strepII	pTrc200 vector expressing C-terminal strepII-tagged TssX.	This study	EML3296
pTrc::tssX-mCherry2	pTrc200 vector expressing mCherry2-inserted TssX. The mCherry2 is fused between the 55th and 56th residues with a GGSGG linker.	This study	EML3246
pTrc::tssL^strepII	pTrc200 vector expressing C-terminal strepII-tagged TssL.	This study	EML3316
pTrc::tssM^strepII	pTrc200 vector expressing C-terminal strepII-tagged TssM.	This study	EML3318
pTrc::bexD(H)^strep	pTrc200 vector expressing C-terminal strepII-tagged Haemophilus BexD (X54987.1:149..1333).	This study	EML8701
pTrc::tssJ(S)	pTrc200 vector expressing C-terminal strepII-tagged Shinella TssJ (CP081988.1:1581166..1580656).	This study	EML8727
pRL662	GmR. pBBR1 oriV. Broad host range vector for gene expression driven by lac promoter.	Vergunst et al., 2000	EML315
pRL662::tssL	pRL662 vector expressing TssL.	Ma 2009	EML1296
pRL662::tssM	pRL662 vector expressing TssM.	Ma 2009	EML934
pSRKGm	Broad host range vector for gene expression driven by lac promoter. LacI expression cassette.	Xu 2013	EML8750
pSRKGm::pleD	pSRKGm vector expressing pleD (atu1297).	Xu 2013	EML8751
Suicide vectors
pJQ200ks	GmR. oriT+p15A ori. SacB reporter. Suicide vector for bacteria genome manipulation.	Quandt et al., 1993	EML1432
pJQ200ks-tssX(KO)	To introduce tssX knock-out in the Agrobacterium C58 background.	This study	EML4213
pJQ200ks-tssX-mCherry2	To introduce the mCherry2 knock-in between the 55th and 56th residues of TssX in the Agrobacterium C58 background.	This study	EML3248
pJQ200ks-sfGFP-tssG	To introduce the sfGFP knock-in the sfGFP in the N-terminus of tssG in the Agrobacterium C58 background.	This study	EML3310
pJQ200ks-tssB-sfGFP	To introduce the sfGFP knock-in the sfGFP in the C-terminus of TssB in the Agrobacterium C58 background.	This study	EML3311
pJQ200ks-tssM(KO)	To introduce tssM knock-out in the Agrobacterium C58 background.	Lin et al., 2013	EML1044
pJQ200ks-tssK(KO)	To introduce tssK knock-out in the Agrobacterium C58 background.	This study	EML5182
pJQ200ks-tssC40(KO)	To introduce tssC40 knock-out in the Agrobacterium C58 background.	Lin et al., 2013	EML947
pEML041003	KmR. oriT+p15A ori. SacB reporter. Suicide vector for bacteria genome manipulation.	This study	EML5065
pEML057016	pEML041003::sfGFP_tssL. To introduce the sfGFP knock-in the sfGFP in the N-terminus of TssL in the Agrobacterium C58 background.	This study	EML3264
pEML057020	pEML041003::fha(KO). To introduce fha knock-out into the Agrobacterium background.	This study	EML3322
pEML057022	pEML041003::tssB_mCherry2. For generation of chromosomal expressed tssB_mCherry2	This study	EML3326
pEML057023	pEML041003::tssX_mNeonGreen. To introduce the mNeoFreen knock-in between the 55th and 56th residues of TssX in the Agrobacterium C58 background.	This study	EML8703
pEML057025	pEML041003::tssK(KO)_sfGFP-L. To introduce tssK knock-out into sfGFP_tssL background.	This study	EML8748

## Sheet: Primers
Name	Sequence (5'-3')
TssX-F1-NcoI	GAGACCATGGTGAAAAAGTTGGGTACGGTT
TssX-R1-HindIII	TTCCAAGCTTGCGCTACAGCTTCTGTAG
TssX-C16A-F	CTTTTGAGCGCCGCAGCAAAGCCATCT
TssX-C16A-R	AGATGGCTTTGCTGCGGCGCTCAAAAG
TssX-R-strep-HindIII	TCTGAAGCTTTCATTTTTCGAACTGCGGGTGGCTCCATGCGCTGTTGCCGCTGCCGGGCA
tssL-R-strep-XbaI	TCTGTCTAGATCATTTTTCGAACTGCGGGTGGCTCCATGCGCTTGGCTGGGCCTCTCCCG
tssM-R-strep-HindIII	TCTGAAGCTTTCATTTTTCGAACTGCGGGTGGCTCCATGCGCTGAACTGCGCAGGGCAGG
tssF-in-pJQ-F	AATTGGGTACCGGGCCCCCCCTCGAAGCTTCCGTTTGGTGGTGGG
tssF-R	CCCGGTCTCCTAAAGCAACGGC
tssF-sfGFP-F	CCGGCCGTTGCTTTAGGAGACCGGGATGGACCGTAAAGGCGAAGAG
sfGFP-GGSGG-R	GCCGCCGCTGCCGCCTTTGTACAGTTCATCCATACCATGCG
GGSGG-tssG-F	GAACTGTACAAAGGCGGCAGCGGCGGCATGGACCAGCAAATGCCAACCA
tssG-pJQ-R	GGAGCTCCACCGCGGTGGCGGCCGCTCTAGCCCGCTGAAACGCAGAAGTGT
tssB-pJQ-F	AATTGGGTACCGGGCCCCCCCTCGAATGGCAAGTGTACATGAAAAGCTGG
tssB-GGSGG-R	ACGGTCCATGCCGCCGCTGCCGCCTTCGCTCGCGCCGTTCTTTTC
GGSGG-sfGFP-F	GGCGGCAGCGGCGGCATGGACCGTAAAGGCGAAGAG
sfGFP-tssC-R	GGGAGGTTTTCCTCCGCACAGGCGACTATTTGTACAGTTCATCCATACCATGCG
tssC-up-F	TCGCCTGTGCGGAGGAAAAC
tssC-in-pJQ-R	GGAGCTCCACCGCGGTGGCGGCCGCTCTTGAAGAGGCGGGACTGATCG
sfGFPtssL-BsaI-F	TCAGGTCTCTATGATGGACCGTAAAGGCGAAGAG
sfGFPtssL-BsaI-R	ACAGGTCTCACATTTTGTACAGTTCATCCATACCATGCGT
fha-GG-1	GTCAGGTCTCAGGAGAAGACACACTTCTGCGTTTCAGC
fha-GG-2	GACTGGTCTCTCATGTCCTGGCCCTCACACG
fha-GG-6	CTCTGGTCTCTGTCCTGGCCCTCACACGGAAAT
fha-GG-5	GTCAGGTCTCAGGACATGAGACATGAGAACCGTGTTGCC
fha-GG-3	GACTGGTCTCTCATGGGGGTAAACAACCACGATGAGACA
fha-GG-4	CACTGGTCTCTAGCGGCCAGCCCGATGAGATCGTAAC
tssB-GG-1	GTCAGGTCTCAGGAGATGGCAAGTGTACATGAAAAGCTGG
tssB-GG-2	CACTGGTCTCTCCGCTGCCGCCTTCGCTCGCGCCGTTCTTTTC
mCherry2-GG-3-new	GTCAGGTCTCAGCGGCGGCATGGTGAGTAAAGGAGAAGAAA
mCherry2-GG-4-new	GACTGGTCTCTGCGATTATTTGTATAGTTCATCCATGCC
tssC-GG-5	GTCAGGTCTCATCGCCTGTGCGGAGGAAAAC
tssC-GG-6	CACTGGTCTCTAGCGCTTGAAGAGGCGGGACTGATCG
tssX-GG-1	GTCAGGTCTCAGGAGTGGTCGTCTGCGCCATAAACG
tssX-GG-2	GACAGGTCTCACAACTTTTTCATCCCTCATCCCCT
TssX-GG-3	GTCAGGTCTCAGTTGGGTACGGTTTTGCTGATGGC
TssX-GG-4	GACTGGTCTCTGCTGCCGCCTGCAGACACCG
mNG-GG-1	CTCAGGTCTCACAGCGGAGGCATGGTGAGCAAGGGCGAGGAG
mNG-GG-2	CTCAGGTCTCAGCCACCGCTTCCCTTGTACAGCTCG
tssX-GG-5	GTCAGGTCTCATGGCATTCAAAGCGCTTCCGGT
tssX-GG-6	CACTGGTCTCTAGCGCTGACGGTCCTCCCGCATGAT
tssK-up-GG-F	GTCAGGTCTCAGGAGACAGCGTTTTCCCGGATACA
tssK-up-GG-R	GACTGGTCTCTGCAGATGCTGAACGCGAAGAAACA
tssK-dw-GG-F	GTCAGGTCTCACTGCATCTGGCGGGCGAGTT
tssK-dw-GG-R	CACTGGTCTCTAGCGCGGCGGTGATGTAAACATTGTGGC
	Restriction sites are underlined, whereas the point mutated sites are in bold.
